# Supplementary material
Source: publisher figshare collection journal article supplement (https://frontiersin.figshare.com/ndownloader/files/14699780)
Supplement: Supplementary file [file 14699780]

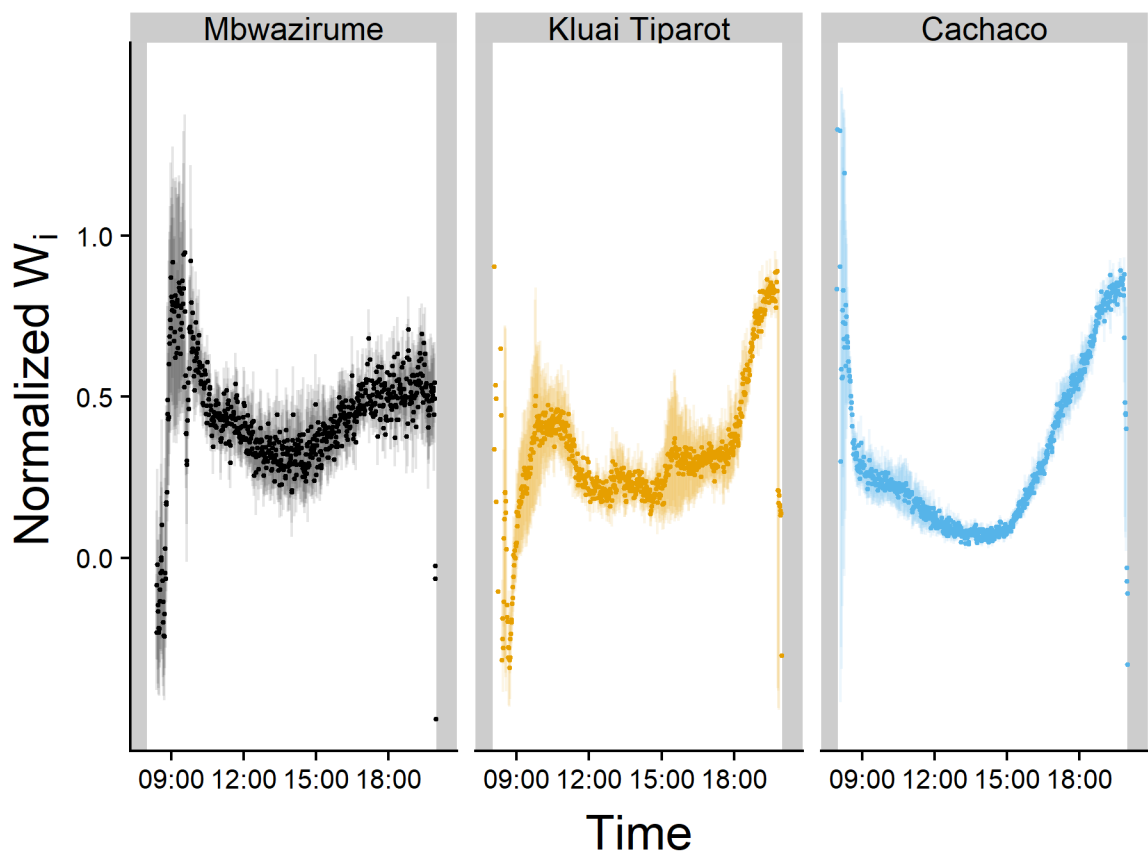

**Supplementary figure 4:** Normalized intrinsic water use efficiency profiles of three representative cultivars show an increase in  $WUE_i$  in the afternoon.
